# Supplementary material for: Traditional Brazilian Diet and Olive Oil Reduce Cardiometabolic Risk Factors in Severely Obese Individuals: A Randomized Trial
Source: MDPI journal article supplement (doi:10.3390/nu12051413), 2020-05-14
Supplement: s1 [file s1]

## Supplementary data

Supplementary Table S1. Main features of the Traditional Brazilian Diet (DieTBra)

*versus* the Mediterranean Diet (MedDiet).

| DieTBra                                                                                                                                                                                                                                                                                                                                                                                                                                                                                                | MedDiet                                                                                                                                                                                                                                                                                                                      |
|--------------------------------------------------------------------------------------------------------------------------------------------------------------------------------------------------------------------------------------------------------------------------------------------------------------------------------------------------------------------------------------------------------------------------------------------------------------------------------------------------------|------------------------------------------------------------------------------------------------------------------------------------------------------------------------------------------------------------------------------------------------------------------------------------------------------------------------------|
| <ul style="list-style-type: none"><li>• Plenty of tropical fruits within small meals, raw and cooked vegetables and legumes at lunch and dinner</li><li>• Bread, coffee and milk at breakfast</li><li>• Moderate consumption of dairy products (whole milk, yellow and white cheese, yogurt, curd, butter)</li><li>• Small portion of red meat</li><li>• Rare seafood</li><li>• Rare nuts</li><li>• Rice and beans at lunch and dinner</li><li>• Predominant use of soy oil to prepare meals</li></ul> | <ul style="list-style-type: none"><li>• Plenty of vegetables, legumes, seeds</li><li>• Whole grains</li><li>• Breads</li><li>• Moderate consumption of poultry, eggs, cheese and yogurt</li><li>• Rare consumption of red meat</li><li>• Seafood</li><li>• Nuts</li><li>• Great amount of olive oil</li><li>• Wine</li></ul> |
